# Supplementary material for: C1 CAGE detects transcription start sites and enhancer activity at single-cell resolution
Source: PubMed Central journal article supplement (PMC6341120; doi:10.1038/s41467-018-08126-5), 2019-01-21
Supplement: 41467_2018_8126_MOESM3_ESM.pdf [file 41467_2018_8126_MOESM3_ESM.pdf]

## **Description of Additional Supplementary Files**

File Name: Supplementary Data 1

Description: Lists of FISH probes used.

File Name: Supplementary Data 2

Description: TGF- $\beta$  time-course expression table.
